# Supplementary material for: Visible light promoted photocatalytic water oxidation: effect of metal oxide catalyst composition and light intensity
Source: Royal Society of Chemistry journal article supplement (doi:10.1039/c5cy01203a), 2015-01-01
Supplement: c5cy01203a1.pdf [file c5cy01203a1.pdf]

## Electronic Supporting Information

### Visible light promoted photocatalytic water oxidation: effect of metal oxide catalyst composition and light intensity

D. Walsh,\* N.M. Sanchez-Ballester, V.P. Ting, S.R. Hall, L. R. Terry, and M. T. Weller\*

#### Experimental

##### Synthesis of metal oxides

For the synthesis of  $\text{Co}_3\text{O}_4$  and  $\text{Fe}_2\text{O}_3$  0.02M of the metal nitrate salt (3.65g  $\text{Co}(\text{NO}_3)_2 \cdot 6\text{H}_2\text{O}$  and 5g  $\text{Fe}(\text{NO}_3)_3 \cdot 9\text{H}_2\text{O}$  respectively) was dissolved in 60ml of water in a flask held on a magnetic stirrer. For the synthesis of  $\text{CoFe}_2\text{O}_4$  and  $\text{MnFe}_2\text{O}_4$  0.0067M and 0.0133M of the corresponding metal nitrate salts were used. To this stirred solution 7.5g of dextran (Mr 70k) was added and dissolved with stirring. Dilute ammonia was added to raise the pH to 10.2 which was marked by a colour change to brown or black, the mixture was then stirred for a further 10min. before microwaving the solution briefly such that it was heated to  $80^\circ\text{C}$ , this was to assist in the formation of the spinel oxide. In the case of cobalt oxide preparations microwave heating was marked by a colour change from brown black to dark red. The mixtures were then cooled with ice and dilute nitric acid added dropwise to give a pH of  $\sim 8$ , followed by centrifuging at 3500rpm for 10min to remove bulk precipitate. The supernatant solution was collected and dried in a fume hood followed by storing in a desiccator overnight.

1-2g of the dried solid was then heated in ceramic crucible in a furnace to  $450^\circ\text{C}$  with a heating rate of  $25^\circ\text{C min}$ . It was observed a controlled combustion occurred between  $170\text{-}220^\circ\text{C}$  with formation of high surface area open frameworks of metal oxide, heating was continued to  $450^\circ\text{C}$  and held at this temperature for 5 minutes to remove traces of residual carbon, before being allowed to cool to room temperature. Approximately 80mg of metal oxide per g of dried solid was obtained. A commercial laser ablated  $\text{Co}_3\text{O}_4$  (Sigma-Aldrich 637025, measured  $S_{\text{BET}} = 35.8\text{m}^2\text{ g}^{-1}$ ) was used for comparison.

##### Water oxidations

Nitrogen degassed DI water was used to prepare an acetate buffer of pH 5.2 (50mM sodium acetate adjusted with acetic acid). A custom made three arm 50ml glass flask was taken and 120 mg of  $[\text{Co}(\text{NH}_3)_5\text{Cl}]\text{Cl}_2$  (98%) electron acceptor and 45mg  $[\text{Ru}(\text{bpy})_3]\text{Cl}_2 \cdot 6\text{H}_2\text{O}$  (99.95%) sensitizer added together with 25ml of buffer. The reaction flask was covered with foil to shield from light and stirred for 5 minutes to allow the electron acceptor to fully dissolve. 10mg of the metal oxide catalyst suspended in a further 10ml of the degassed buffer was then added. The light shielded reaction flask was then left stirring for 20 minutes for the system to equilibrate. The light shield covering was then removed and the stirred flask illuminated by blue led (3W, 120 lumen,  $\lambda_{\text{max}}$  455-465 nm) held at a specific distance from the edge of the reaction flask to give generated a measured output of between 0.6 to  $10\text{mW/cm}^2$  between 420-499nm (Solartech Inc. Solar Meter 9.4), at the reaction flask (with measured led light exposed surface area of  $31.5\text{cm}^2$ ).  $\text{O}_2$  release was monitored in situ using a Pyroscience Firesting  $\text{O}_2$  fibre optic  $\text{O}_2$  sensor with an OXYROB10 oxygen probe together with a TDIP temperature sensor to give automatic compensation for minor fluctuation in reaction flask temperature.  $\text{O}_2$  readings at 10s intervals were recorded to minimize possible photobleaching effects on the  $\text{O}_2$  sensor. These probes were fitted into the flask aperture and reactions in air were conducted in

the flask ( $O_2$  level was zeroed after equilibration).  $O_2$  production after light on was monitored for 70 minutes. Micromoles of  $O_2$  gas released into the known headspace volume was calculated from measured  $O_2$  ppm increase. The reaction mixture pH was also simultaneously monitored using a Eutech Cyberscan pH110 with an RS232 output. Samples runs were conducted in triplicate with representative  $O_2$  and proton release profiles shown.

During a photocatalyzed water oxidation the  $[Co(NH_3)_5Cl]Cl_2$  electron acceptor decomposes with release of ammonia and  $Co(OH)_2$ . [1]

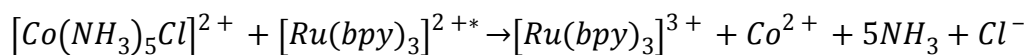

For experiments with repeat use of the mixed phase  $Fe_2O_3$ , the catalyst was collected by use of a neodymium magnet followed by washing with DI water and drying before re-use in the reaction.

Photocatalytic water oxidations in the absence of  $[Ru(bpy)_3]^{2+}$  or  $[Co(NH_3)_5Cl]^{2+}$  gave no measurable  $O_2$  production. Reactions conducted with  $[Ru(bpy)_3]^{2+}$  and  $[Co(NH_3)_5Cl]^{2+}$  in the absence of added metal oxide catalyst gave a low level production of  $\sim 20 \mu\text{mol}$  of  $O_2$  generation after 60 min following a prolonged lag time, most likely due to some in-situ generation of cobalt oxide from some decomposition of the pentamine electron acceptor.

**a**

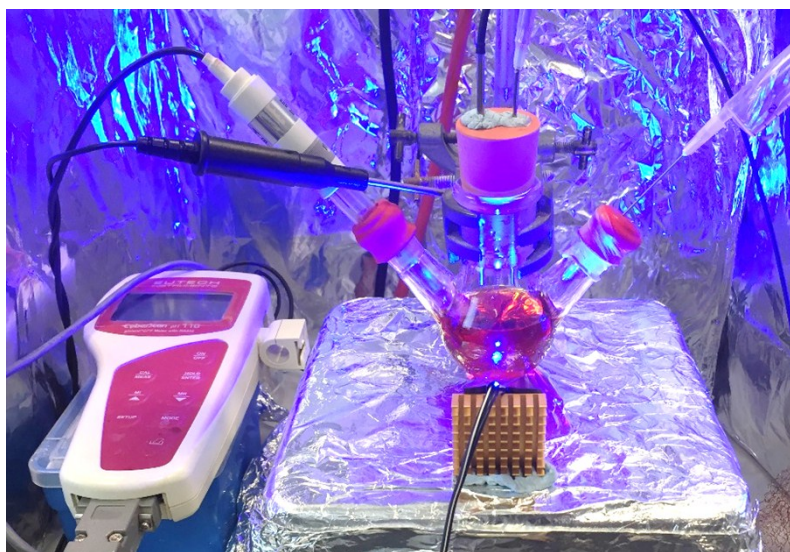

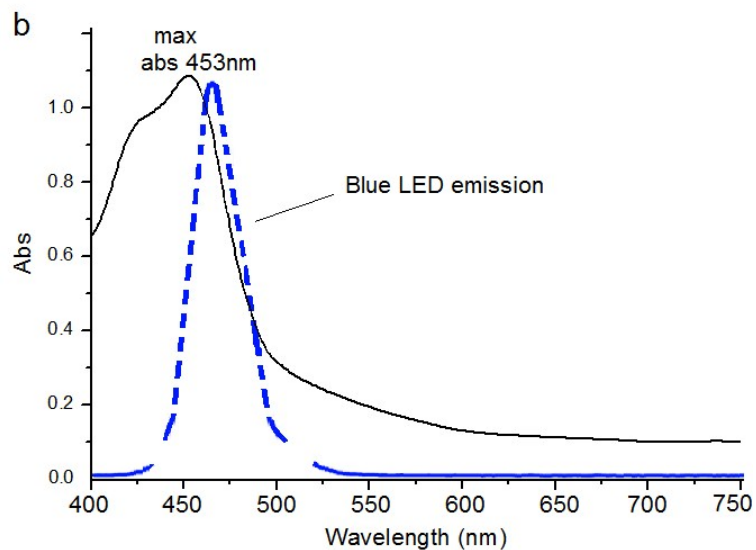

a) Image showing photocatalytic water oxidation experimental set-up, a fibre optic O<sub>2</sub> sensor and temperature compensation probe were held in the flask head space, pH of the reaction was monitored simultaneously. Light at a measured mWcm<sup>-2</sup> intensity at the flask surface from a 455-465nm blue led was employed as the light source. (b) Visible light absorption spectrum of [Ru(bpy)<sub>3</sub>]Cl<sub>2</sub> in degassed water and overlapping emission spectrum (dotted line) of the blue led illumination source.

## **Instrumentation**

### ***Oxygen measurements***

Accurate gaseous O<sub>2</sub> was determined with a Pyroscience Firesting O2 fibre optic oxygen meter fitted with an OXYROB10 robust O<sub>2</sub> probe coupled with a TDIP15 temperature compensation probe.

### ***SEM and Energy Dispersive X-ray analysis***

FEG-SEM was conducted on uncoated samples using a JEOL JSM 6330F high resolution SEM fitted with a field emission gun. EDX analysis was conducted with an Oxford instruments ISIS 310.

### ***Raman***

Powder samples were analysed with a Bruker Equinox 55 spectrometer using a 532nm laser with an integrated FRA 106 Raman module.

### ***TEM***

Samples were sonicated in water/ethanol and mounted on formvar coated copper mesh grids and examined using a Jeol 1200 EXII TEM operating at 120kV with attached Gatan dual view digital camera.

### ***Powder X-ray diffraction***

Siemens D5000 powder X-ray diffractometer (CuK $\alpha$ )

### ***UV/vis spectrometry***

Solid state UV-vis reflectance spectrometry of powder samples over 250-800nm was conducted using a Perkin Elmer Lambda 750s UV/Vis/NIR spectrometer fitted with a Labsphere 60 mm integrating sphere. Background correction was made using a Labsphere certified reflectance standard.

### ***Surface area analysis (BET)***

Calculated BET specific surface areas from gas sorption (N<sub>2</sub>, 77 K) were measured on Micromeritics 3-Flex gas sorption analyser. All samples were degassed at 150°C/8 h under dynamic high vacuum (10<sup>-6</sup> mbar) prior to analysis.

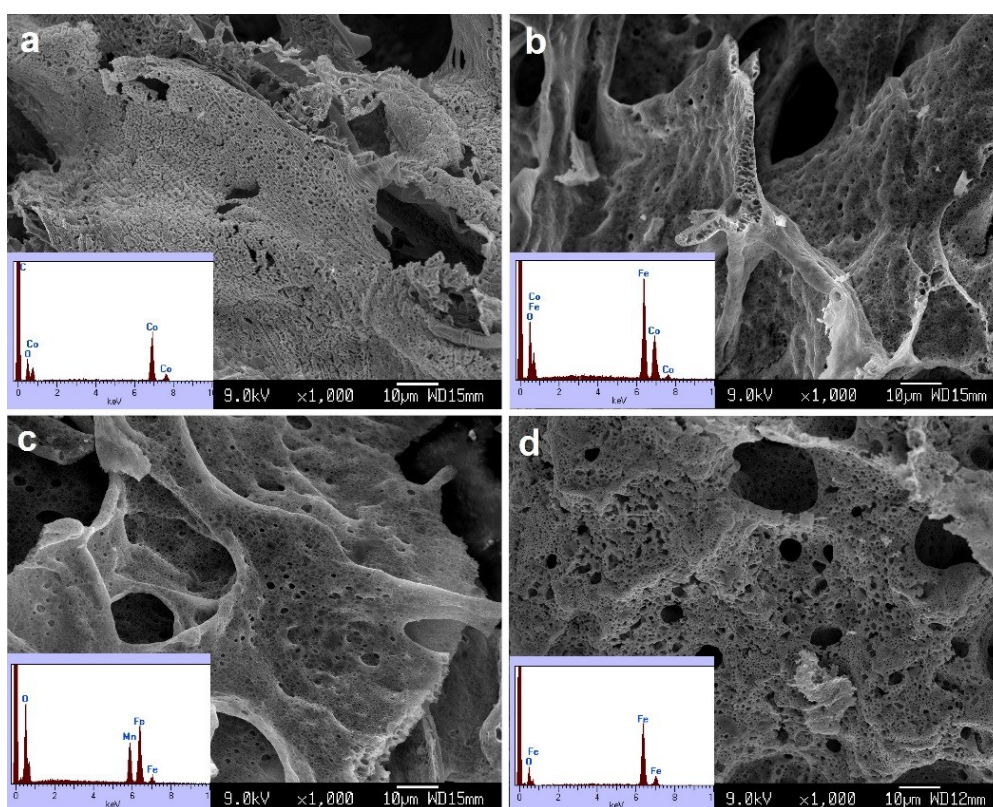

Fig. S1. SEM images of prepared samples of (a)  $\text{Co}_3\text{O}_4$ ; (b)  $\text{CoFe}_2\text{O}_4$ ; (c)  $\text{MnFe}_2\text{O}_4$ ; (d)  $\gamma/\alpha\text{-Fe}_2\text{O}_3$ . Insets show measured EDX analysis.

a)

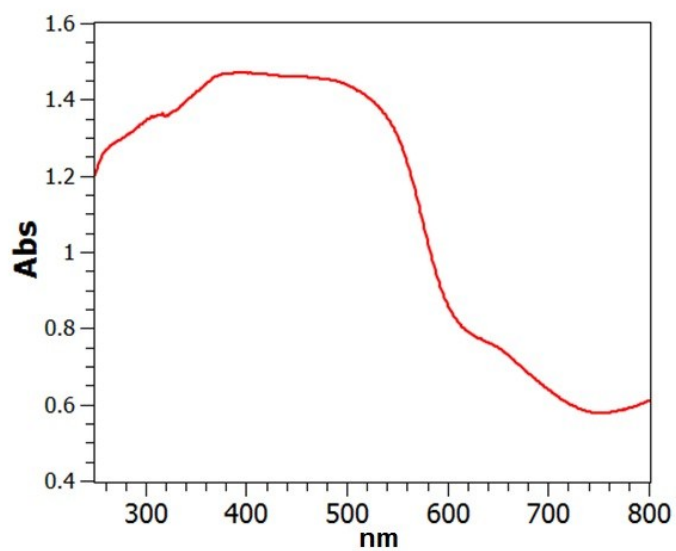

b)

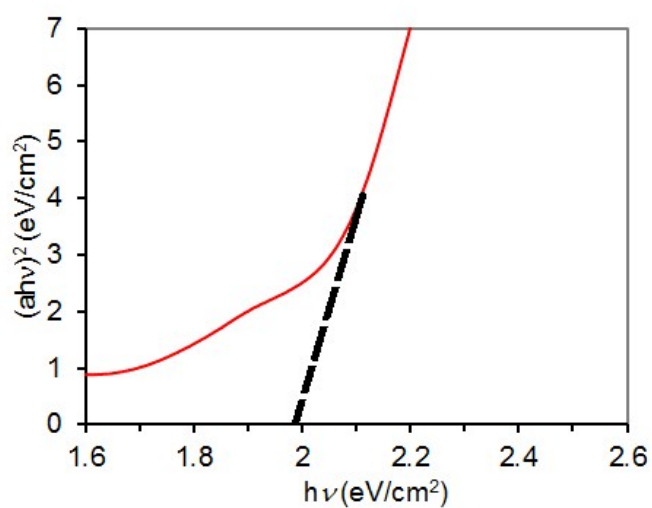

Fig. S2. (a) Solid state uv-visible spectrophotometry of prepared mixed phase Fe<sub>2</sub>O<sub>3</sub>; (b) Tauc plot of  $(ah\nu)^2$  against  $(h\nu)$  for the direct transition for Fe<sub>2</sub>O<sub>3</sub> and extrapolation to  $(ah\nu)^2 = 0$ , which gives a band gap for this prepared mixed phase Fe<sub>2</sub>O<sub>3</sub> of  $\sim 1.98$ eV (626nm).

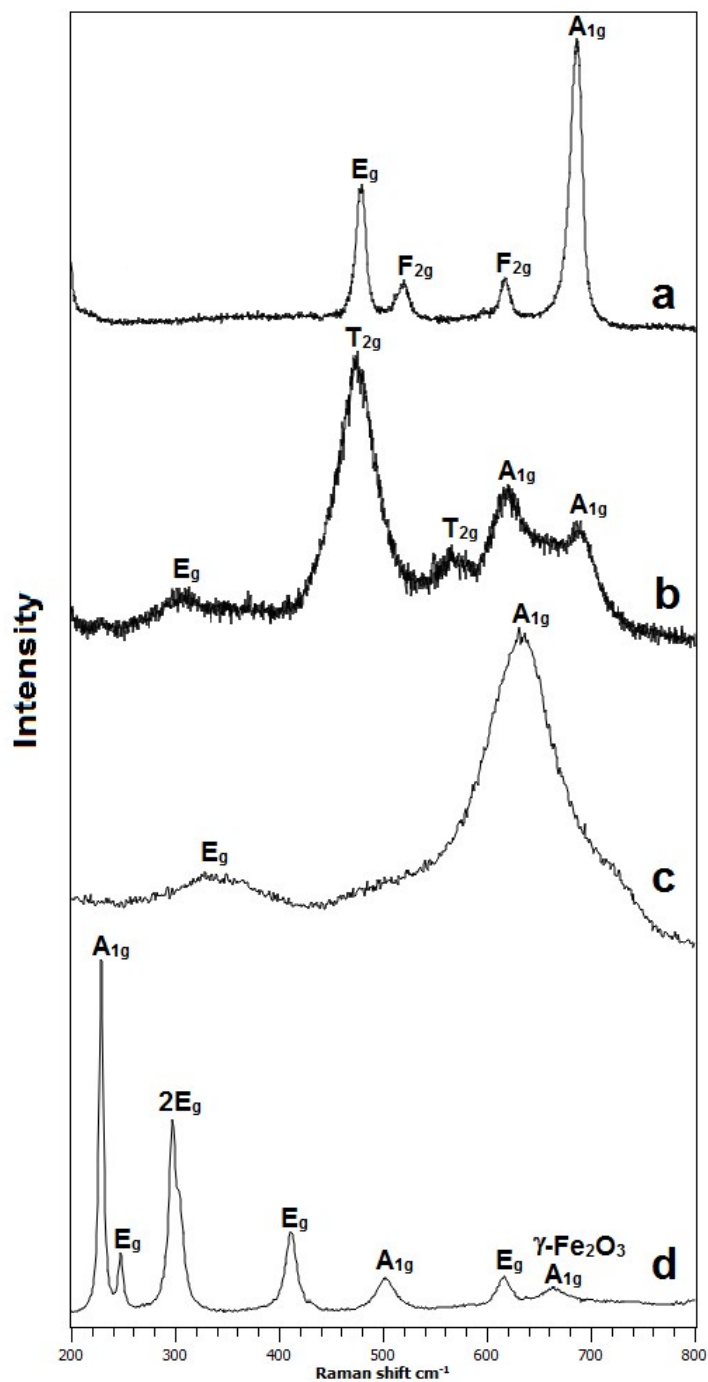

Fig. S3. Raman spectroscopy of prepared samples showing (a)  $\text{Co}_3\text{O}_4$ ; (b)  $\text{CoFe}_2\text{O}_4$ ; (c)  $\text{MnFe}_2\text{O}_4$ ; (d)  $\gamma\text{-Fe}_2\text{O}_3$  and  $\alpha\text{-Fe}_2\text{O}_3$ . Raman active phonon modes are labelled and correspond to reported shifts for the prepared samples. Raman intensities for  $\gamma\text{-Fe}_2\text{O}_3$  (maghemite) are weak therefore the spectrum is dominated by the  $\alpha\text{-Fe}_2\text{O}_3$  (hematite) phase present.[2-5]

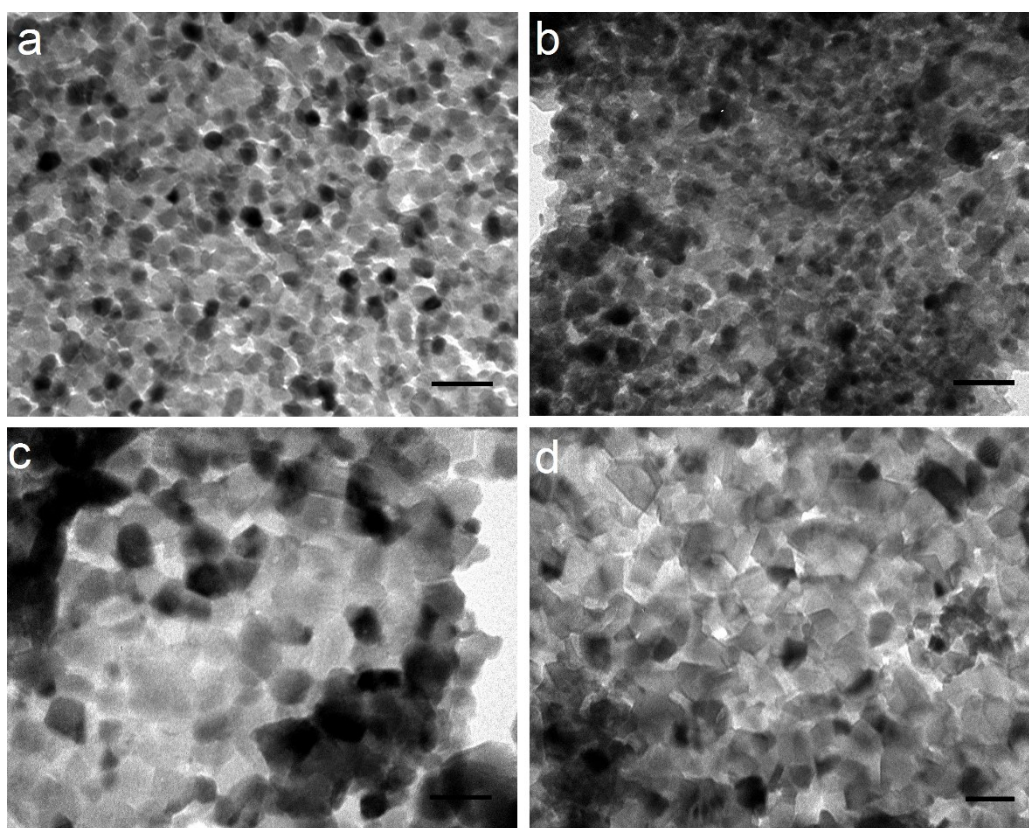

Fig. S4. TEM images of prepared metal oxides showing (a)  $\text{Co}_3\text{O}_4$ ; (b)  $\text{CoFe}_2\text{O}_4$ ; (c)  $\text{MnFe}_2\text{O}_4$ ; (d)  $\alpha/\gamma\text{-Fe}_2\text{O}_3$ . Scale bar = 50nm.



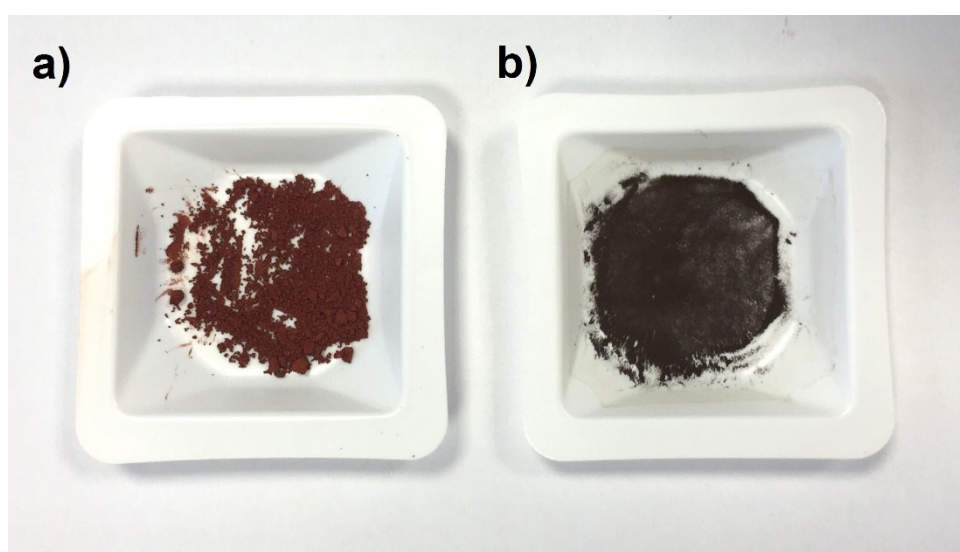

Fig. S5. Image of mixed phase  $\text{Fe}_2\text{O}_3$  used as catalyst in photocatalytic water oxidation reaction (a) before reaction; (b) after four successive reactions showing darkening of colour due to surface accumulation of cobalt oxides from decomposed electron acceptor.

a)

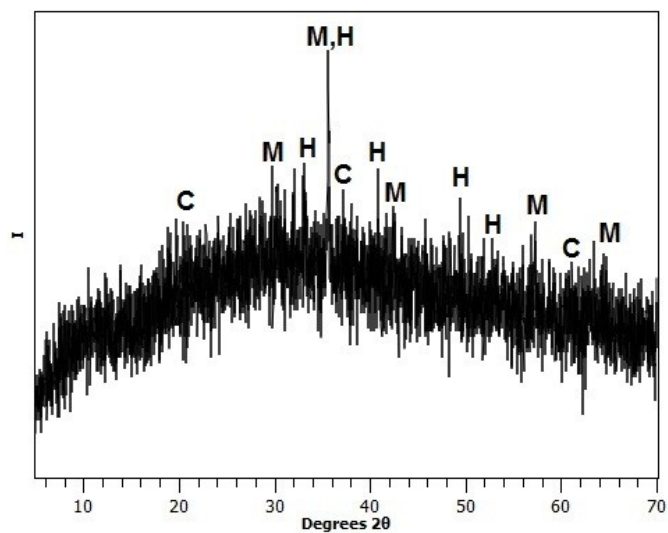

b)

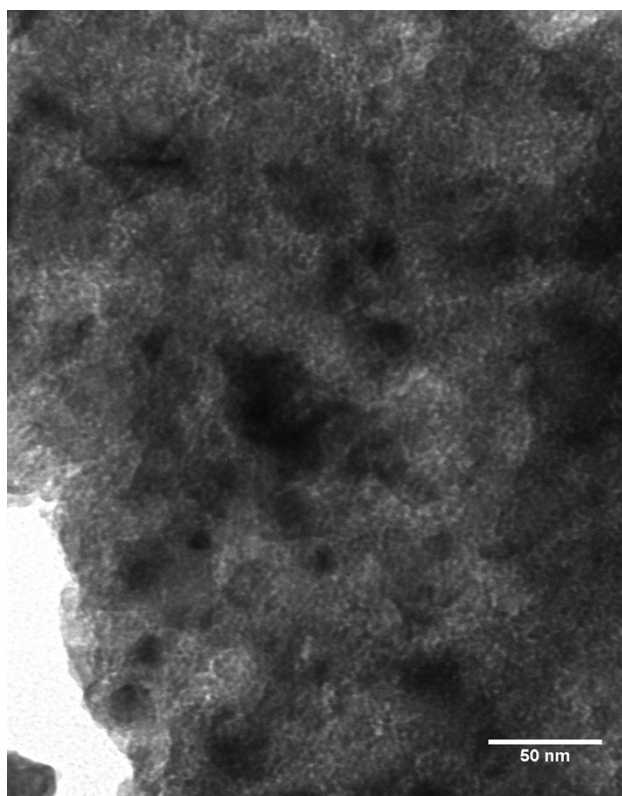

Fig. S6. Prepared mixed phase  $\text{Fe}_2\text{O}_3$  catalyst after recovery from four successive photocatalytic water oxidation reactions (a) Powder XRD showing M-maghemite, H-hematite and C –  $\text{Co}_3\text{O}_4$ ; (b) TEM image showing  $\text{Fe}_2\text{O}_3$  crystals with bound coating of cobalt oxide nanoparticles after four successive water oxidation reactions.

## Example calculations

### *Example of Turn over Frequency calculation*

Taking as example the prepared  $\text{Co}_3\text{O}_4$  sample

10mg of  $\text{Co}_3\text{O}_4 = 7.342\text{mg}$  of Co present in photocatalytic reaction

Moles =  $7.342\text{mg}/58.93 = 0.1245 \times 10^{-3}$  moles

Measured maximum level of  $\text{O}_2$  generation was  $0.105\mu\text{mol}$  per second

TOF =  $0.105\mu\text{mol sec}^{-1} / 0.1245 \times 10^{-3}$  moles =  $0.8433 \times 10^{-3}$  mol ( $\text{O}_2$ )  $\text{sec}^{-1} / \text{mol}$  (Co)

**TOF =  $0.843 \times 10^{-3}$  mol ( $\text{O}_2$ )  $\text{sec}^{-1} / \text{mol}$  (Co) (at the initial linear  $\text{O}_2$  generation period)**

**TOF =  $0.843 \times 10^{-3} \text{ s}^{-1}$**

TOF's for other catalysts were determined similarly and were normalized to active metal or mixed metal content.

### *Example of Quantum Yield ( $\Phi$ ) calculation*

Since the results showed that surface areas of the catalysts changed continuously throughout the reaction a photonic method was used for determining Quantum Yields.

Taking as example the prepared  $\text{Co}_3\text{O}_4$  sample

Using wavelength of  $452\text{nm}$ , intensity of light measured at  $5\text{mW}/\text{cm}^2$  impinging on  $31.5\text{cm}^2$  surface =  $157.5\text{mW}$ , maximum  $\text{O}_2$  yield obtained within 35 min used.

Energy of a single photon at  $452\text{nm} = h.c/\lambda$

=  $6.626 \times 10^{-34} \times 2.998 \times 10^8 / 452 \times 10^{-9} = 4.365 \times 10^{-19} \text{ J}$

Total power absorbed =  $157.5\text{mW} \times 35 \text{ min} \times 60 = 330.7\text{J}$

Number of  $\text{O}_2$  molecules produced =  $98\mu\text{mol} \times 6.022 \times 10^{23} = 5.901 \times 10^{19}$

Taking that 4 photons are absorbed per  $\text{O}_2$

**Quantum Yield  $\Phi = 5.901 \times 10^{19} / (330.7 \text{ J} / 4.365 \times 10^{-19} \text{ J}) \times 400\% = 31.1\%$**

$\Phi$  with other catalysts were calculated similarly taking into account maximum rate, yield and light intensity used.

## References

1. Duan, L., et al., *Visible Light-Driven Water Oxidation by a Molecular Ruthenium Catalyst in Homogeneous System*. Inorganic Chemistry, 2010. **49**(1): p. 209-215.
2. Hadjiev, V.G., M.N. Iliev, and I.V. Vergilov, *The Raman spectra of  $\text{Co}_3\text{O}_4$* . Journal of Physics C: Solid State Physics, 1988. **21**(7): p. L199.
3. Chandramohan, P., et al., *Cation distribution and particle size effect on Raman spectrum of  $\text{CoFe}_2\text{O}_4$* . Journal of Solid State Chemistry, 2011. **184**(1): p. 89-96.

4. Pereira, C., et al., *Superparamagnetic  $MFe_2O_4$  ( $M = Fe, Co, Mn$ ) Nanoparticles: Tuning the Particle Size and Magnetic Properties through a Novel One-Step Coprecipitation Route*. Chemistry of Materials, 2012. **24**(8): p. 1496-1504.
5. El Mendili, Y., et al., *New evidences of in situ laser irradiation effects on  $\gamma$ - $Fe_2O_3$  nanoparticles: a Raman spectroscopic study*. Journal of Raman Spectroscopy, 2011. **42**(2): p. 239-242.
